# Supplementary material
Source: Springer Nature journal article supplement (https://www.springermedizin.de/resource/supplementary/13098_2009_36_MOESM1_ESM.pdf/9670510)
Supplement: MOESM1 [file 9670510]

# Correlations

## Lipid profile and PAI-1

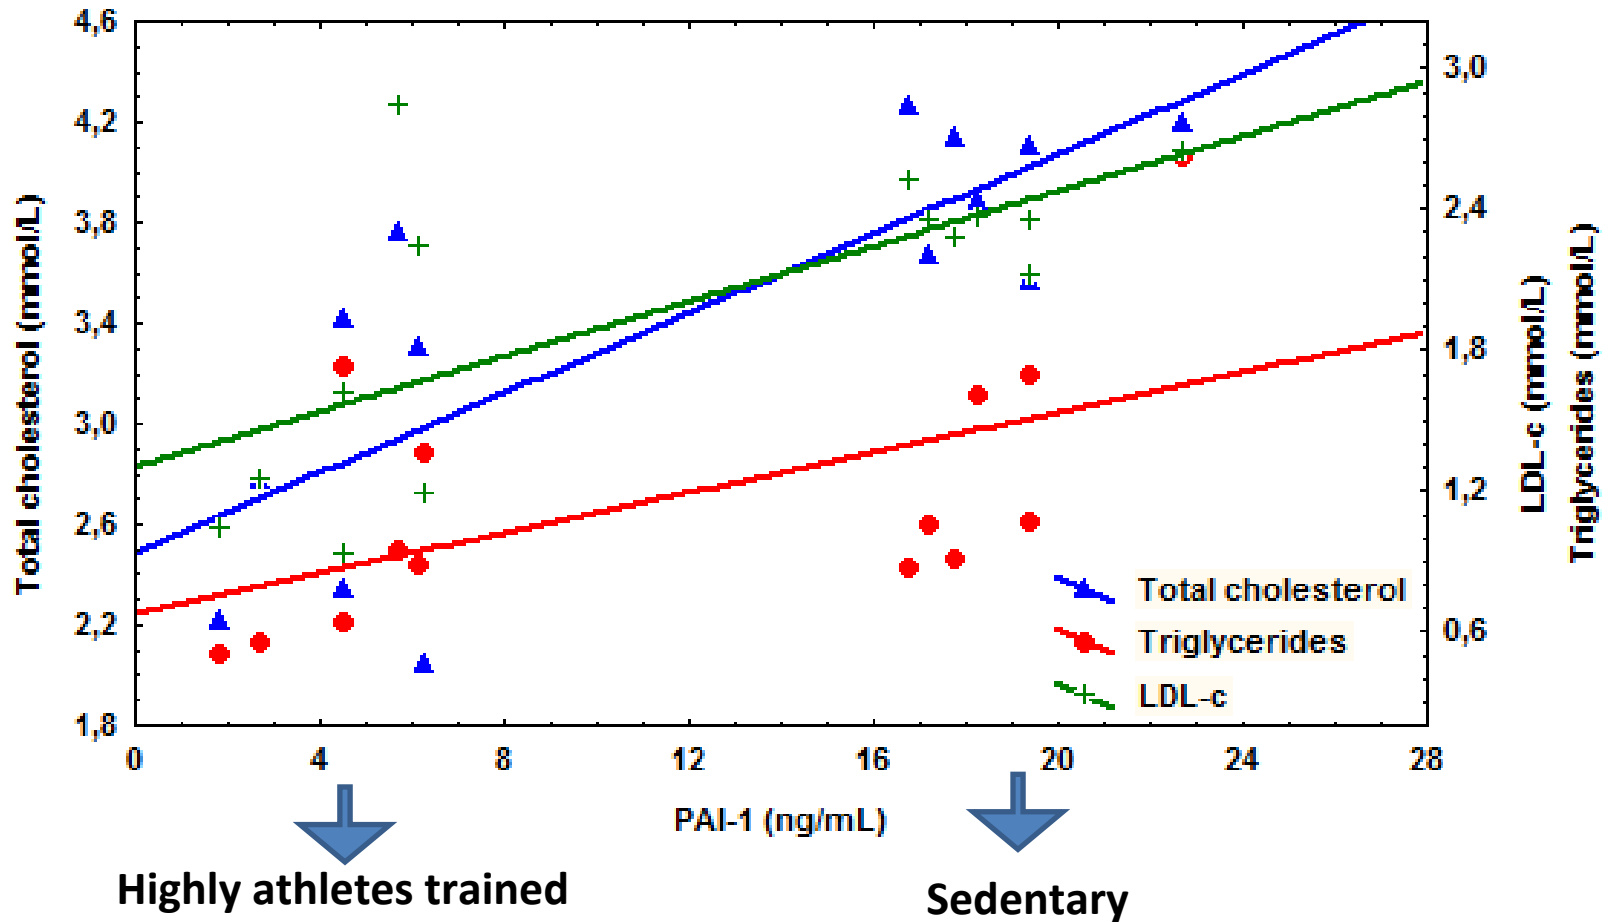

PAI-1 x CHO  $r=0.78$ ;  $p=0.001$

PAI-1 x TG  $r=0.56$ ;  $p=0.036$

PAI-1 x LDL-c  $r=0.70$ ;  
 $p=0.006$

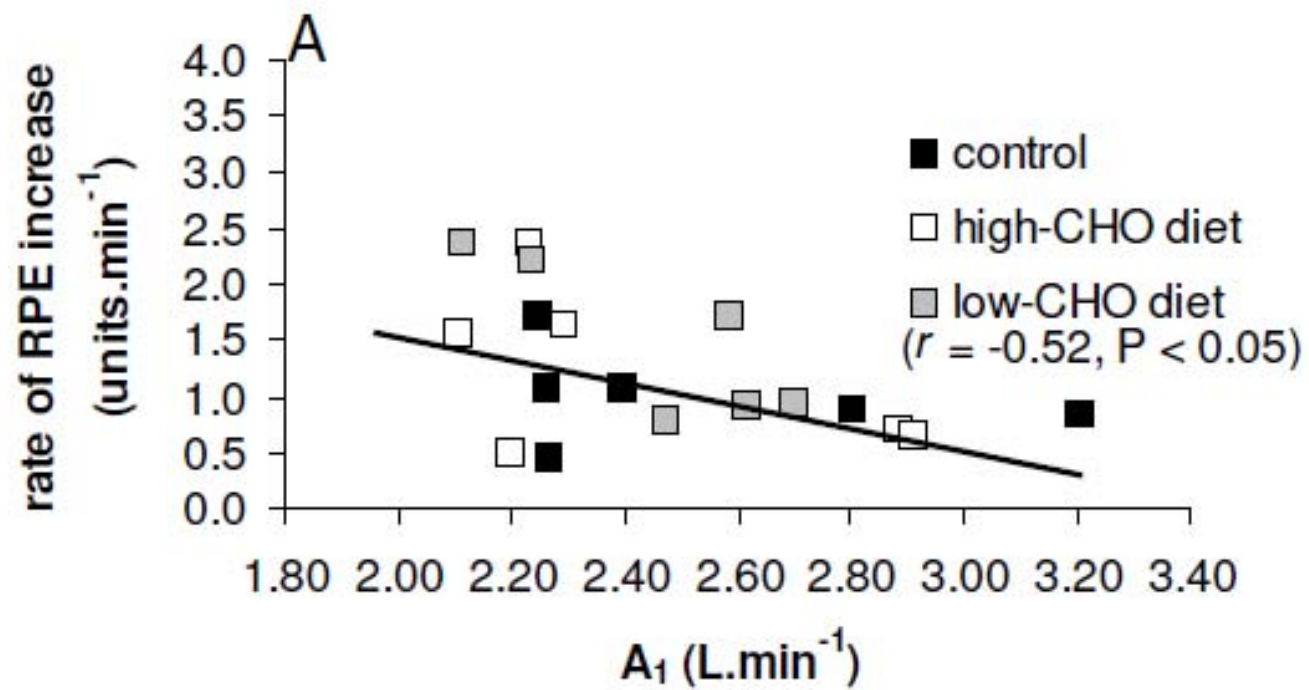

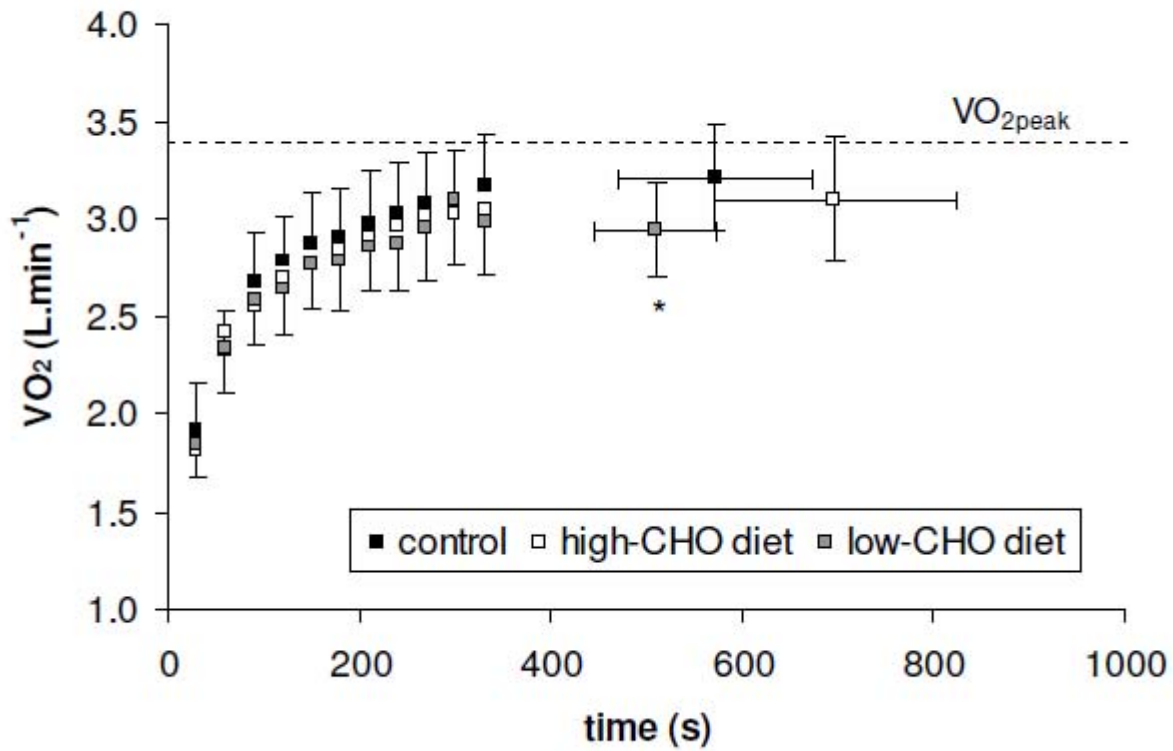

## atletas

Scatterplot (fio.STA 8v\*7c)

$\text{CHO0 (L)} = 2,266 + 0,128 * x + \text{eps}$

$\text{TG0 (R)} = 0,301 + 0,143 * x + \text{eps}$

$\text{LDL\_C0 (R)} = 0,572 + 0,226 * x + \text{eps}$

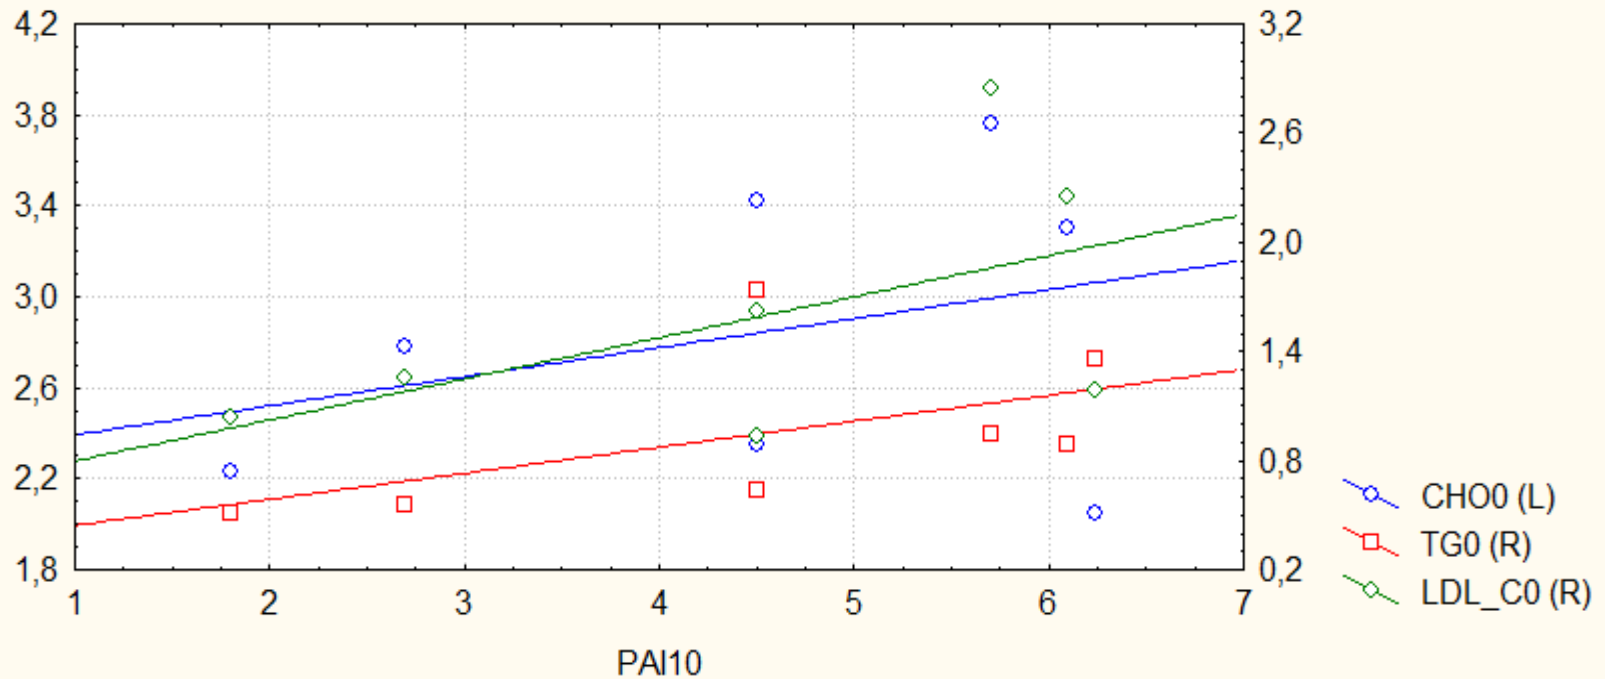

**PAI-1 x CHO  $r=0.33$ ,  $p=0.47$**

**PAI-1 x TG  $r=0.53$ ,  $p=0.21$**

**PAI-1 x LDL-c  $r=0.54$ ,  $p=0.20$**

## sedentários

Scatterplot (fio.STA 8v\*7c)

$$\text{CHO1 (L)} = 3,593 + 0,021 * x + \text{eps}$$

$$\text{TG1 (R)} = -3,883 + 0,282 * x + \text{eps}$$

$$\text{LDL\_C1 (R)} = 1,83 + 0,029 * x + \text{eps}$$

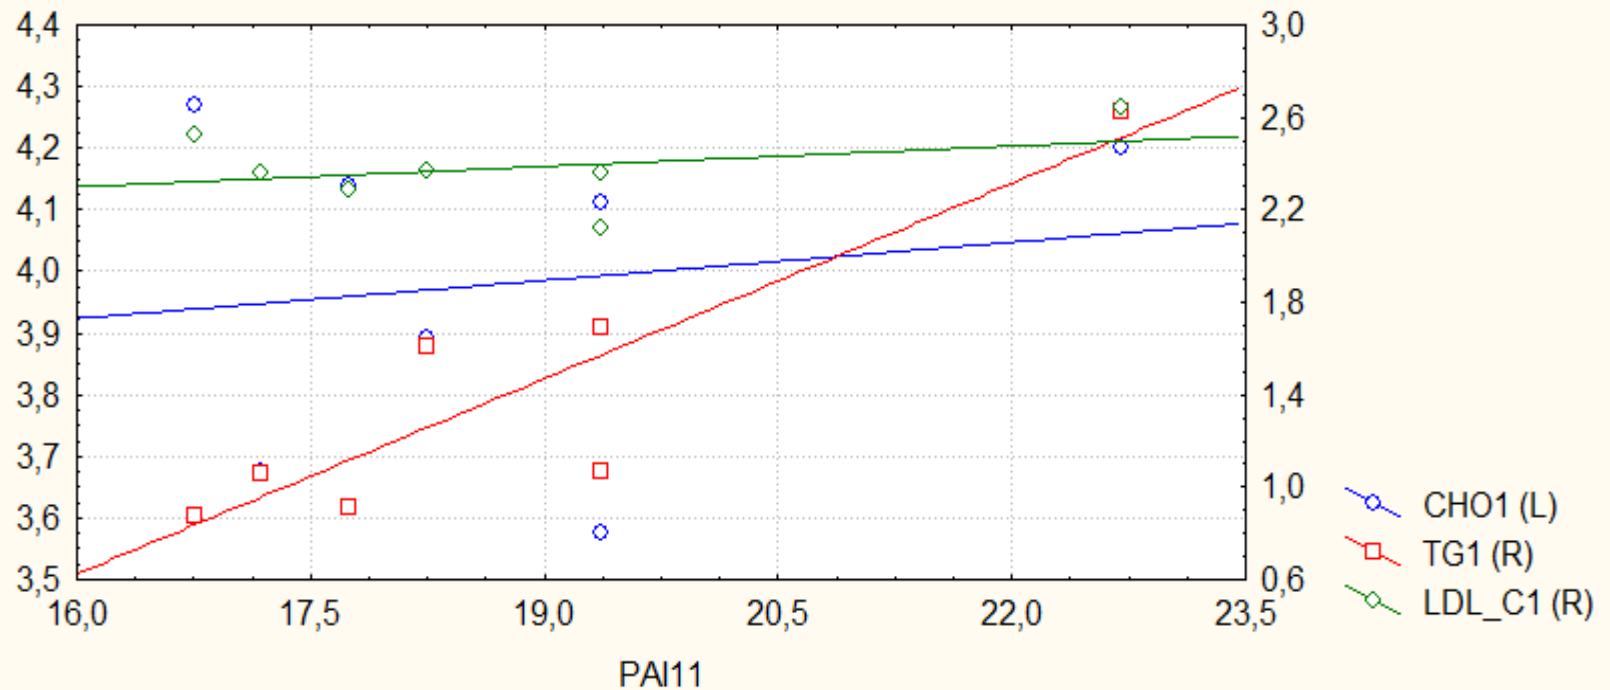

**PAI-1 x CHO  $r=0.15$ ,  $p=0.74$**

**PAI-1 x TG  $r=0.90$ ,  $p=0.006$**

**PAI-1 x LDL-c  $r=0.35$ ,  $p=0.43$**
